# Supplementary material for: Undernutrition during pregnancy in mice leads to dysfunctional cardiac muscle respiration in adult offspring
Source: Oxford University Press journal article supplement (doi:10.1042/bsr20150007), 2015-04-13
Supplement: bsr035e200add.pdf [file bsr035e200add.pdf]

Figure S1.

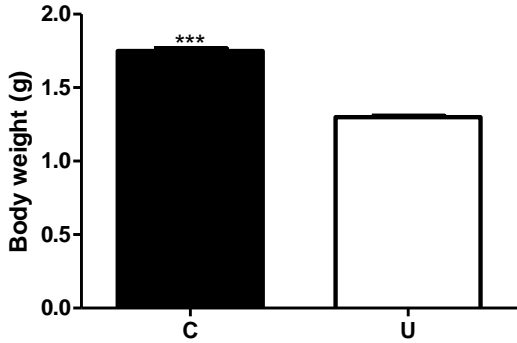

Figure S2.

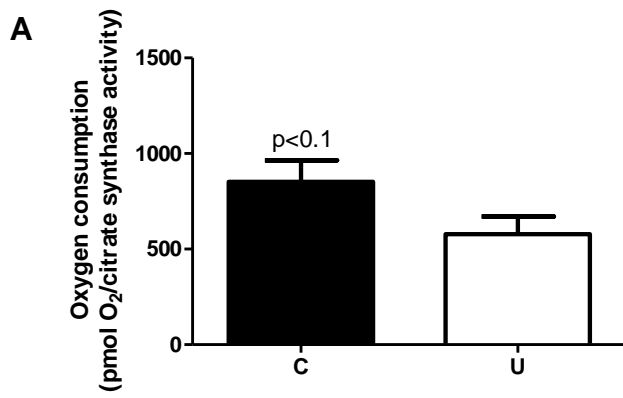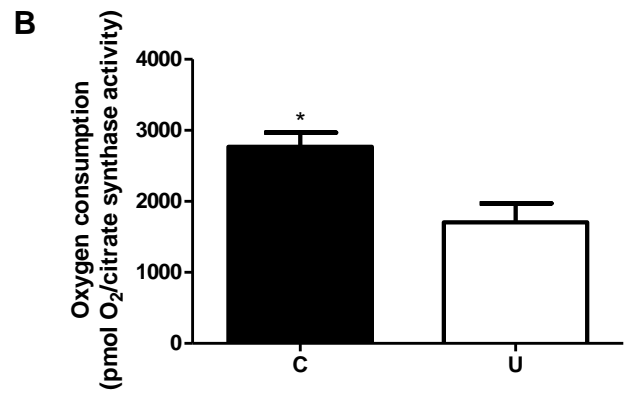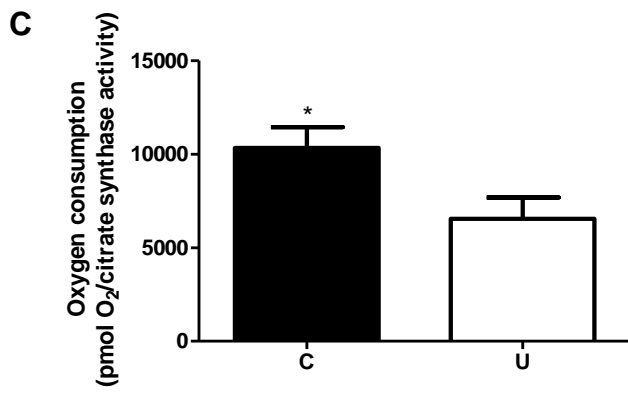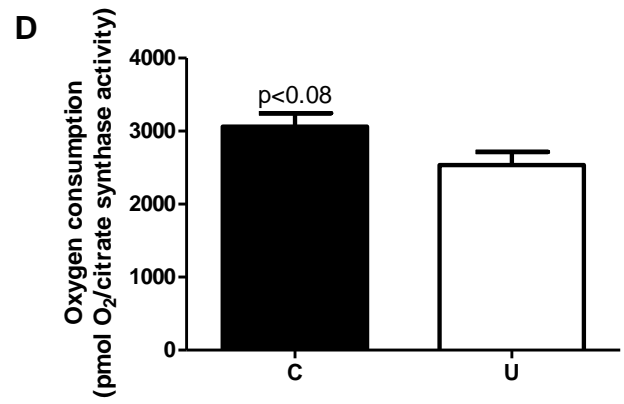

## Supplemental Figure Legends

**Figure S1.** *In utero* undernutrition causes low birth weight. Weight of the offspring at 1 day of age. Student's *t*-test, \*\*\*= $p < 0.0001$ . Values are mean  $\pm$  SEM,  $n=32$ . Black = C (control offspring), white = U (*in utero* undernourished offspring).

**Figure S2.** *In utero* undernutrition alters energetics in heart homogenate.  $O_2$  flux in heart homogenate from 10 wk old mice. Values are expressed relative to citrate synthase activity. Data are shown for adenylate free leak respiration ( $L_N$ ; A), maximal electron flow through electron-transferring flavoprotein and fatty acid oxidative capacity ( $P_{ETF}$ ; B), maximum oxidative phosphorylation capacity ( $P_{OXPHOS}$ ; C), and oligomycin-induced leak respiration ( $L_{omy}$ ; D). Values are mean  $\pm$  SEM,  $n=5$ , \*= $p < 0.05$ . Black = C (control offspring), white = U (*in utero* undernourished offspring).

**Table S1.** Plasma acylcarnitine levels

| Acylcarnitine                                                        | Plasma level ( $\mu\text{M}$ ; mean $\pm$ SEM) |                   |                   |                   |
|----------------------------------------------------------------------|------------------------------------------------|-------------------|-------------------|-------------------|
|                                                                      | C-L                                            | U-L               | C-R               | U-R               |
| Acetylcarnitine                                                      | 5.116 $\pm$ 0.617                              | 8.236 $\pm$ 0.808 | 2.397 $\pm$ 0.285 | 2.779 $\pm$ 0.642 |
| Propionylcarnitine                                                   | 0.104 $\pm$ 0.016                              | 0.137 $\pm$ 0.015 | 0.078 $\pm$ 0.010 | 0.102 $\pm$ 0.010 |
| Malanoylcarnitine                                                    | 0.012 $\pm$ 0.001                              | 0.018 $\pm$ 0.003 | 0.010 $\pm$ 0.001 | 0.011 $\pm$ 0.002 |
| Butyrylcarnitine and/or isobutyrylcarnitine                          | 0.131 $\pm$ 0.019                              | 0.146 $\pm$ 0.014 | 0.130 $\pm$ 0.018 | 0.119 $\pm$ 0.019 |
| 3-hydroxy-butyrylcarnitine                                           | 0.132 $\pm$ 0.012                              | 0.169 $\pm$ 0.018 | 0.095 $\pm$ 0.012 | 0.098 $\pm$ 0.011 |
| Methylmalanoylcarnitine and/or succinylcarnitine                     | 0.019 $\pm$ 0.001                              | 0.029 $\pm$ 0.004 | 0.024 $\pm$ 0.003 | 0.035 $\pm$ 0.007 |
| Isovaleryl carnitine and/or 2-methylbutyryl                          | 0.044 $\pm$ 0.005                              | 0.047 $\pm$ 0.004 | 0.026 $\pm$ 0.006 | 0.029 $\pm$ 0.006 |
| Tiglylcarnitine                                                      | 0.007 $\pm$ 0.002                              | 0.007 $\pm$ 0.002 | 0.007 $\pm$ 0.002 | 0.006 $\pm$ 0.002 |
| Hydroxyisovalerylcarnitine and/or 2-methyl-3-hydroxybutyrylcarnitine | 0.021 $\pm$ 0.002                              | 0.024 $\pm$ 0.005 | 0.016 $\pm$ 0.003 | 0.014 $\pm$ 0.005 |
| Glutaryl carnitine                                                   | 0.017 $\pm$ 0.002                              | 0.022 $\pm$ 0.002 | 0.019 $\pm$ 0.002 | 0.020 $\pm$ 0.003 |
| Hexanoylcarnitine                                                    | 0.024 $\pm$ 0.005                              | 0.026 $\pm$ 0.005 | 0.013 $\pm$ 0.002 | 0.012 $\pm$ 0.002 |
| 3-methylglutaryl carnitine                                           | 0.031 $\pm$ 0.001                              | 0.039 $\pm$ 0.005 | 0.029 $\pm$ 0.001 | 0.029 $\pm$ 0.001 |
| Octanoylcarnitine                                                    | 0.007 $\pm$ 0.002                              | 0.013 $\pm$ 0.003 | 0.011 $\pm$ 0.003 | 0.009 $\pm$ 0.002 |
| Octenoylcarnitine                                                    | 0.021 $\pm$ 0.002                              | 0.021 $\pm$ 0.002 | 0.022 $\pm$ 0.004 | 0.022 $\pm$ 0.003 |
| Decanoylcarnitine                                                    | 0.010 $\pm$ 0.002                              | 0.011 $\pm$ 0.003 | 0.009 $\pm$ 0.003 | 0.007 $\pm$ 0.002 |
| Decenoylcarnitine                                                    | 0.019 $\pm$ 0.002                              | 0.021 $\pm$ 0.003 | 0.017 $\pm$ 0.002 | 0.015 $\pm$ 0.002 |
| Dodecanoylcarnitine                                                  | 0.021 $\pm$ 0.004                              | 0.021 $\pm$ 0.003 | 0.015 $\pm$ 0.002 | 0.015 $\pm$ 0.002 |
| Dodecenoylcarnitine                                                  | 0.011 $\pm$ 0.001                              | 0.014 $\pm$ 0.004 | 0.012 $\pm$ 0.003 | 0.010 $\pm$ 0.003 |
| 3-hydroxydodecenoylcarnitine                                         | 0.027 $\pm$ 0.004                              | 0.028 $\pm$ 0.003 | 0.029 $\pm$ 0.003 | 0.022 $\pm$ 0.003 |
| 3-hydroxydodecanoylcarnitine                                         | 0.010 $\pm$ 0.003                              | 0.013 $\pm$ 0.002 | 0.012 $\pm$ 0.003 | 0.014 $\pm$ 0.002 |
| Myristoylcarnitine                                                   | 0.042 $\pm$ 0.005                              | 0.054 $\pm$ 0.008 | 0.028 $\pm$ 0.004 | 0.019 $\pm$ 0.005 |
| Tetradecenoylcarnitine                                               | 0.042 $\pm$ 0.012                              | 0.044 $\pm$ 0.006 | 0.023 $\pm$ 0.005 | 0.019 $\pm$ 0.004 |
| 3-hydroxytetradecenoylcarnitine                                      | 0.021 $\pm$ 0.004                              | 0.024 $\pm$ 0.004 | 0.018 $\pm$ 0.004 | 0.014 $\pm$ 0.003 |
| Tetradecadienoylcarnitine                                            | 0.016 $\pm$ 0.006                              | 0.021 $\pm$ 0.003 | 0.013 $\pm$ 0.003 | 0.004 $\pm$ 0.002 |
| 3-hydroxytetradecanoylcarnitine                                      | 0.021 $\pm$ 0.004                              | 0.026 $\pm$ 0.003 | 0.023 $\pm$ 0.002 | 0.026 $\pm$ 0.006 |
| Palmitoylcarnitine                                                   | 0.126 $\pm$ 0.019                              | 0.155 $\pm$ 0.014 | 0.096 $\pm$ 0.008 | 0.089 $\pm$ 0.006 |
| 3-hydroxyhexadecenoylcarnitine                                       | 0.011 $\pm$ 0.003                              | 0.013 $\pm$ 0.003 | 0.009 $\pm$ 0.002 | 0.010 $\pm$ 0.002 |
| 3-hydroxyhexadecanoylcarnitine                                       | 0.009 $\pm$ 0.003                              | 0.008 $\pm$ 0.001 | 0.006 $\pm$ 0.001 | 0.009 $\pm$ 0.001 |
| Octadecanoylcarnitine                                                | 0.045 $\pm$ 0.006                              | 0.048 $\pm$ 0.004 | 0.036 $\pm$ 0.006 | 0.028 $\pm$ 0.004 |
| Octadecenoylcarnitine                                                | 0.119 $\pm$ 0.023                              | 0.158 $\pm$ 0.025 | 0.073 $\pm$ 0.016 | 0.066 $\pm$ 0.011 |
| 3-hydroxyoctadecadienoylcarnitine                                    | 0.009 $\pm$ 0.003                              | 0.017 $\pm$ 0.002 | 0.008 $\pm$ 0.001 | 0.011 $\pm$ 0.001 |
| 3-hydroxyoctadecanoylcarnitine                                       | 0.014 $\pm$ 0.001                              | 0.008 $\pm$ 0.002 | 0.009 $\pm$ 0.002 | 0.009 $\pm$ 0.003 |

C = control offspring, U = *in utero* undernourished offspring, L = fed *ad libitum*, R = after a 4 wk 40% calorie restriction.
